# Supplementary material
Source: PubMed Central journal article supplement (PMC3935238)
Supplement: NIHMS545140-supplement-01.pdf [file NIHMS545140-supplement-01.pdf]

**anti-GFAP**

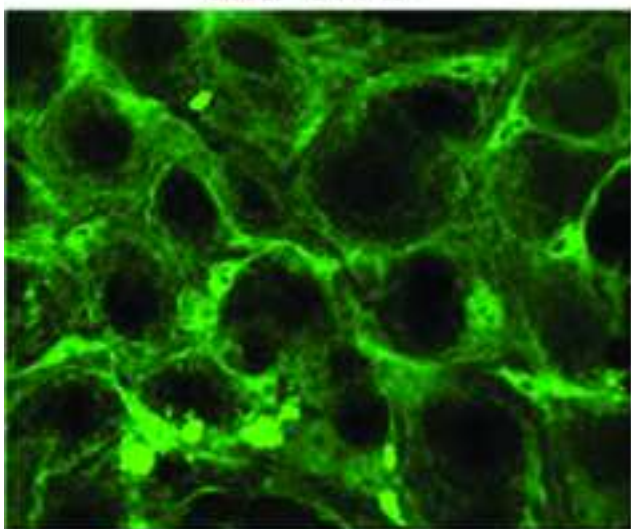

**tdTomato**

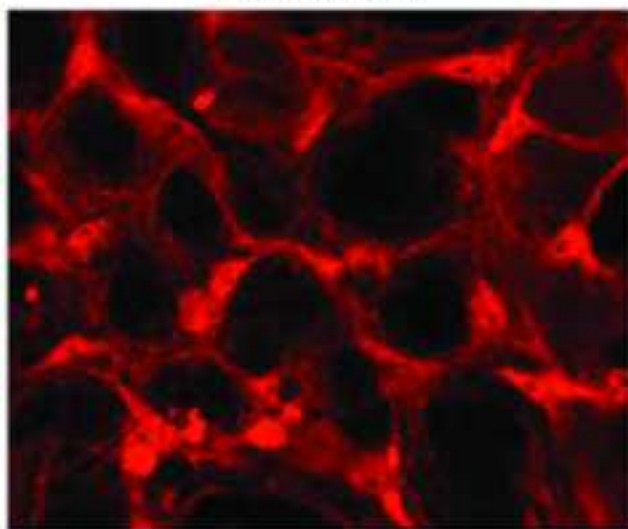

**Merge**

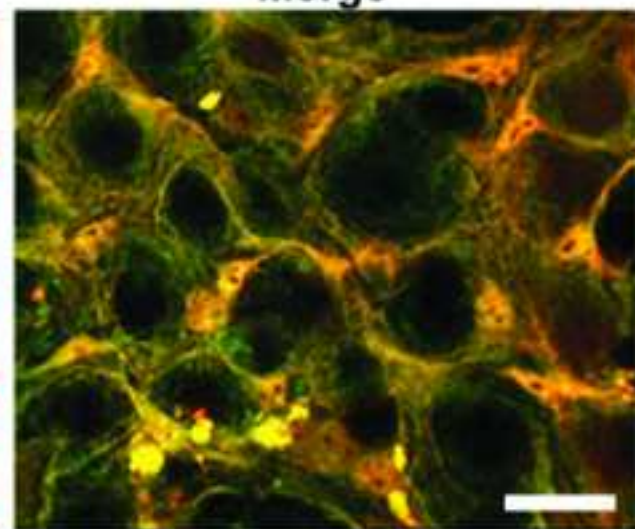

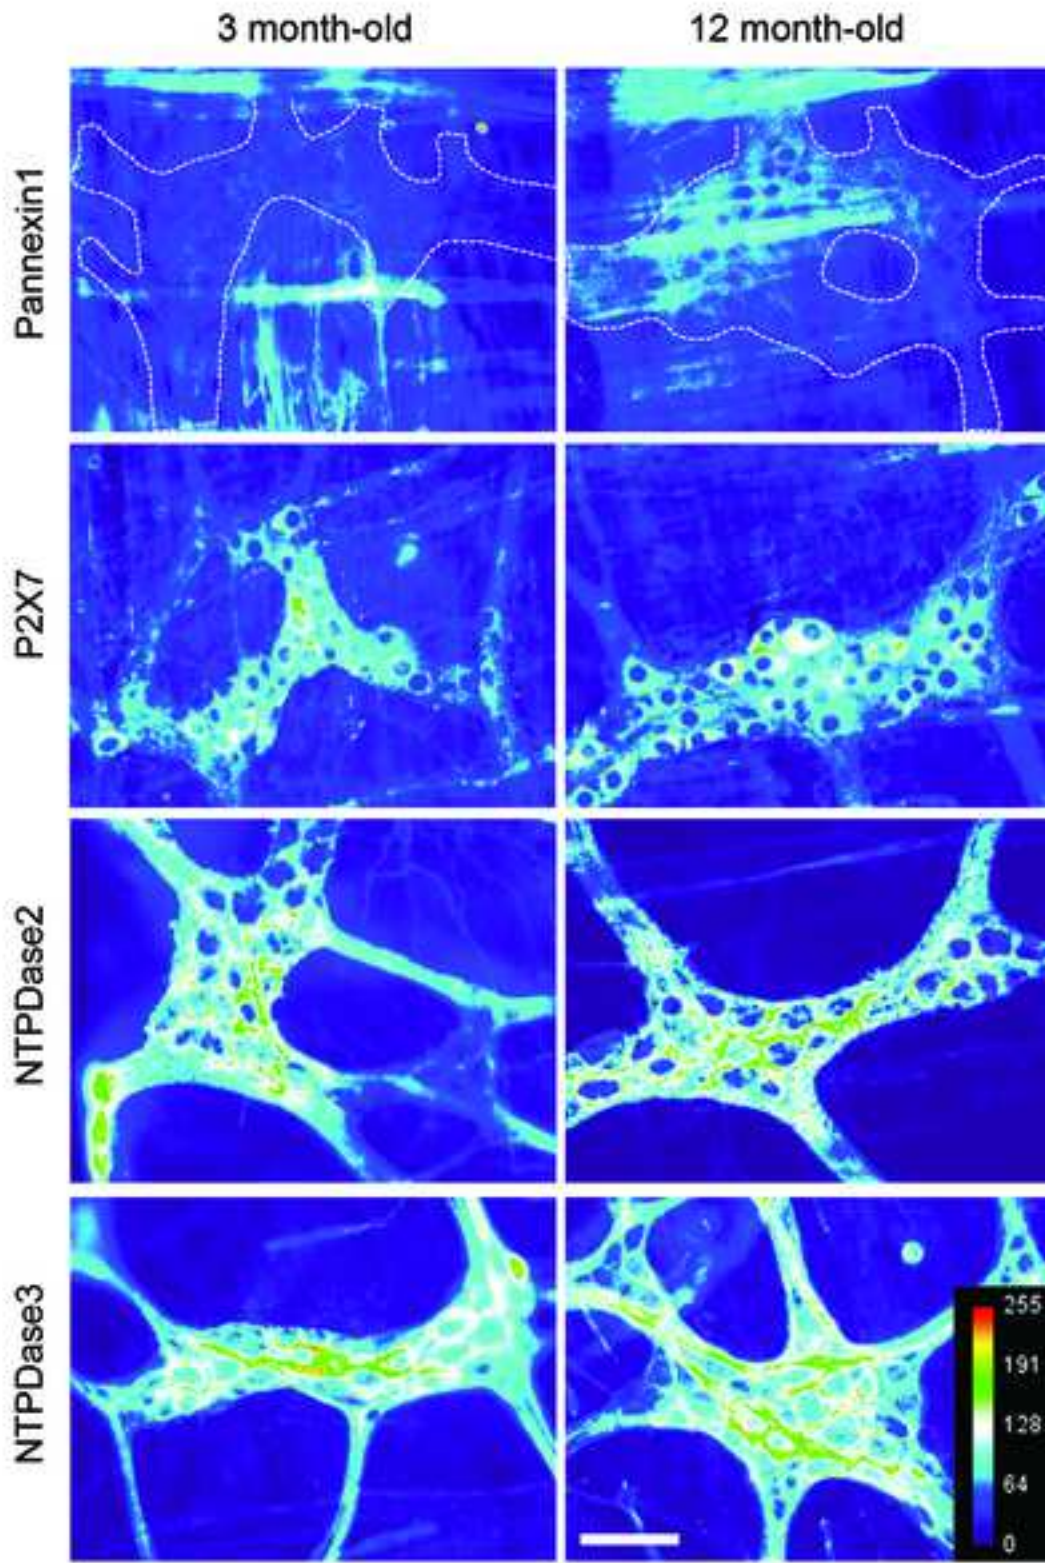

| <b>Antibody</b>                                     | <b>Source</b>                            | <b>Dilution</b> |
|-----------------------------------------------------|------------------------------------------|-----------------|
| <b>Primary Antibodies</b>                           |                                          |                 |
| rabbit anti-pannexin1                               | Invitrogen, Carlsbad, CA                 | 1:100           |
| rabbit anti-P2X7R                                   | Alomone Labs, Ltd., Jerusalem,<br>Israel | 1:200           |
| chicken anti-GFAP                                   | Abcam, Cambridge, MA                     | 1:1,000         |
| rabbit anti-GFAP (Suppl. Fig. 1)                    | Sigma (S9269), St. Louis, MO             | 1:50            |
| rabbit anti-connexin43                              | Abcam, Cambridge, MA                     | 1:1000          |
| rabbit anti-connexin43 (Fig. 1B,C)                  | Sigma, St. Louis, MO                     | 1:500           |
| rabbit anti-NTPDase2                                | Jean Sévigny, Université Laval, QC*      | 1:500           |
| guinea pig anti-NTPDase3                            | Jean Sévigny, Université Laval, QC*      | 1:100           |
| mouse anti- $\beta$ -actin                          | Sigma, St. Louis, MO                     | 1:5,000         |
| <b>Secondary Antibodies</b>                         |                                          |                 |
| goat anti-rabbit Alexa Fluor <sup>®</sup> 488       | Invitrogen, Carlsbad, CA                 | 1:400           |
| goat anti-rabbit Alexa Fluor <sup>®</sup> 568       | Invitrogen, Carlsbad, CA                 | 1:200           |
| goat anti-chicken Alexa Fluor <sup>®</sup> 488      | Invitrogen, Carlsbad, CA                 | 1:200           |
| goat anti-chicken Alexa Fluor <sup>®</sup> 568      | Invitrogen, Carlsbad, CA                 | 1:200           |
| donkey anti-guinea pig Alexa Fluor <sup>®</sup> 594 | Jackson Labs, West Grove, PA             | 1:200           |
| goat anti-rabbit Alexa Fluor <sup>®</sup> 647       | Invitrogen, Carlsbad, CA                 | 1:10,000        |
| goat anti-mouse IRDye <sup>®</sup> 800              | Rockland, Gilbertsville, PA              | 1:10,000        |

\*Please see <http://www.ectonucleotidases-ab.com/> for a complete listing of antibodies produced by Jean Sévigny

**Supplementary Figure 1.** Cre recombination in EG. Confocal microscopy of the myenteric plexus from the colon of a *hGFAP::Cre<sup>ERT2+/-</sup>/tdTomato<sup>+/-</sup>* reporter mouse treated with tamoxifen. Tamoxifen-mediated recombination drives tdTomato expression in all EG expressing GFAP, a specific marker of EG, but not other cells in the gut. Scale bar = 10  $\mu$ m.

**Supplementary Figure 2.** Representative immunoreactivity for pannexin-1 hemichannels, P2X7 receptors, NTPDase2 and NTPDase3 in myenteric ganglia from mice at 3 and 12 m.o.a.. Images are shown as heatmaps to depict immunofluorescence intensity (AFU = arbitrary fluorescence units). Scale bar = 60  $\mu$ m in 12 m.o.a. NTPDase3 applies to all heatmaps.

**Supplementary Table 1.** Details of primary and secondary antibodies used.
